# Supplementary material for: Flanking signal and mature peptide residues influence signal peptide cleavage
Source: PubMed Central journal article supplement (PMC2638155; doi:10.1186/1471-2105-9-s12-s15), 2008-12-12
Supplement: 1471-2105-9-S12-S15-S2.pdf [file 1471-2105-9-S12-S15-S2.pdf]

**Flanking signal and mature peptide residues influence signal peptide cleavage** by Khar Heng Choo and Shoba Ranganathan

**Additional File 2.** Amino acid frequency matrix for the SPs and MPs of eukaryotes and bacteria. Percentage occupancy values from P10 to P10' [-10, +10] are shown, with the cleavage site in dotted line at -1/+1. Significant high and low values, in bold font are highlighted: grey: >10%; black: most preferred residue(s); cyan: charged residue group and green: aliphatic group.

| A. Eukaryote           | -10   | -9    | -8    | -7    | -6    | -5    | -4    | -3    | -2    | -1    | +1    | +2    | +3    | +4    | +5    | +6    | +7    | +8    | +9    | +10   |
|------------------------|-------|-------|-------|-------|-------|-------|-------|-------|-------|-------|-------|-------|-------|-------|-------|-------|-------|-------|-------|-------|
|                        | P10   | P9    | P8    | P7    | P6    | P5    | P4    | P3    | P2    | P1    | P1'   | P2'   | P3'   | P4'   | P5'   | P6'   | P7'   | P8'   | P9'   | P10'  |
| Ala(A)                 | 9.43  | 16.25 | 13.43 | 11.51 | 13.11 | 15.18 | 9.38  | 25.84 | 7.46  | 48.91 | 13.53 | 3.68  | 4.74  | 5.33  | 5.17  | 5.49  | 5.01  | 5.27  | 5.43  | 6.23  |
| Cys(C)                 | 3.68  | 4.05  | 5.91  | 5.81  | 3.68  | 2.18  | 3.36  | 6.50  | 1.49  | 3.57  | 3.41  | 1.92  | 7.73  | 4.16  | 3.46  | 5.01  | 4.85  | 3.84  | 3.84  | 3.89  |
| Asp(D)                 | 0.11  | 0.16  | 0.27  | 0.43  | 0.69  | 3.84  | 1.33  | 0.27  | 3.94  | 0.32  | 5.33  | 7.99  | 5.49  | 5.59  | 5.65  | 5.65  | 5.97  | 5.75  | 4.90  | 5.59  |
| Glu(E)                 | 0.32  | 0.32  | 0.85  | 1.39  | 0.69  | 2.02  | 2.66  | 0.37  | 8.79  | 0.53  | 7.83  | 8.84  | 5.22  | 7.19  | 7.25  | 6.45  | 6.02  | 6.71  | 5.97  | 6.07  |
| Phe(F)                 | 9.11  | 6.87  | 5.86  | 6.77  | 5.91  | 1.60  | 2.34  | 0.64  | 3.46  | 0.21  | 3.57  | 2.18  | 3.62  | 3.36  | 3.14  | 3.94  | 3.09  | 4.53  | 3.04  | 3.94  |
| Gly(G)                 | 4.00  | 3.94  | 5.27  | 4.32  | 3.46  | 11.13 | 13.96 | 9.43  | 3.52  | 20.72 | 7.14  | 5.01  | 6.29  | 8.10  | 6.66  | 7.19  | 5.91  | 8.15  | 8.95  | 8.58  |
| His(H)                 | 0.27  | 0.48  | 0.80  | 0.75  | 0.59  | 2.50  | 1.23  | 0.16  | 4.95  | 0.05  | 1.81  | 2.45  | 2.45  | 2.61  | 3.09  | 2.18  | 3.62  | 1.81  | 2.29  | 2.40  |
| Ile(I)                 | 5.17  | 6.18  | 4.37  | 4.05  | 7.94  | 2.29  | 3.41  | 3.78  | 1.70  | 0.16  | 3.30  | 3.73  | 6.23  | 2.72  | 3.14  | 3.46  | 3.14  | 3.57  | 4.79  | 3.52  |
| Lys(K)                 | 0.11  | 0.00  | 0.05  | 0.91  | 0.16  | 2.08  | 1.92  | 0.37  | 1.44  | 0.11  | 4.64  | 4.95  | 2.45  | 4.79  | 5.38  | 4.85  | 4.85  | 3.84  | 5.27  | 5.22  |
| Leu(L)                 | 43.79 | 37.93 | 29.89 | 36.49 | 27.22 | 7.94  | 16.41 | 4.32  | 15.24 | 1.39  | 8.47  | 4.58  | 9.11  | 5.65  | 5.97  | 7.46  | 6.55  | 7.67  | 8.26  | 7.25  |
| Met(M)                 | 2.40  | 1.97  | 3.30  | 2.50  | 1.81  | 1.17  | 1.70  | 0.27  | 1.76  | 0.21  | 1.12  | 0.69  | 1.70  | 1.28  | 1.70  | 1.17  | 1.33  | 2.13  | 1.44  | 1.70  |
| Asn(N)                 | 0.69  | 0.48  | 0.59  | 1.23  | 0.75  | 2.02  | 0.91  | 0.69  | 4.21  | 0.37  | 2.50  | 4.32  | 3.73  | 3.94  | 4.32  | 3.25  | 5.43  | 4.37  | 4.26  | 4.95  |
| Pro(P)                 | 1.01  | 1.17  | 0.96  | 2.34  | 6.29  | 9.38  | 9.11  | 0.21  | 0.69  | 2.02  | 0.27  | 15.82 | 7.46  | 10.66 | 8.79  | 8.58  | 8.68  | 9.86  | 6.93  | 6.55  |
| Gln(Q)                 | 0.64  | 0.75  | 1.97  | 1.65  | 1.07  | 5.27  | 4.48  | 0.27  | 7.25  | 1.33  | 11.03 | 4.90  | 3.52  | 6.77  | 5.54  | 5.54  | 5.06  | 3.84  | 6.93  | 4.48  |
| Arg(R)                 | 0.11  | 0.21  | 0.37  | 1.17  | 0.75  | 2.98  | 2.88  | 0.37  | 5.54  | 0.96  | 4.95  | 4.69  | 2.29  | 3.62  | 5.59  | 6.13  | 4.58  | 5.49  | 4.00  | 4.21  |
| Ser(S)                 | 3.30  | 6.23  | 7.88  | 6.29  | 6.93  | 12.20 | 8.47  | 13.00 | 11.99 | 13.48 | 8.20  | 9.00  | 7.62  | 7.94  | 7.94  | 6.55  | 6.87  | 8.15  | 8.31  | 6.61  |
| Thr(T)                 | 4.26  | 3.20  | 4.53  | 3.62  | 4.16  | 8.90  | 6.39  | 10.97 | 4.05  | 5.01  | 4.26  | 5.59  | 6.61  | 7.51  | 7.46  | 6.39  | 6.82  | 5.59  | 4.90  | 7.51  |
| Val(V)                 | 10.28 | 8.74  | 10.87 | 5.81  | 12.36 | 5.17  | 7.46  | 22.32 | 3.57  | 0.37  | 4.48  | 6.34  | 8.74  | 5.11  | 5.70  | 7.62  | 6.39  | 5.65  | 6.55  | 6.39  |
| Trp(W)                 | 0.91  | 0.64  | 1.76  | 2.13  | 1.65  | 1.17  | 1.23  | 0.05  | 4.21  | 0.16  | 1.01  | 0.85  | 1.86  | 0.80  | 0.69  | 0.75  | 1.07  | 1.65  | 1.01  | 1.76  |
| Tyr(Y)                 | 0.43  | 0.43  | 1.07  | 0.85  | 0.80  | 0.96  | 1.39  | 0.16  | 4.74  | 0.11  | 3.14  | 2.45  | 3.14  | 2.88  | 3.36  | 2.34  | 4.74  | 2.13  | 2.93  | 3.14  |
| <i>Charged</i>         | 0.91  | 1.17  | 2.34  | 4.64  | 2.88  | 13.43 | 10.02 | 1.55  | 24.67 | 1.97  | 24.56 | 28.93 | 17.90 | 23.81 | 26.96 | 25.25 | 25.04 | 23.60 | 22.43 | 23.49 |
| <i>Small</i>           | 16.73 | 26.43 | 26.58 | 22.11 | 23.49 | 38.52 | 31.81 | 48.27 | 22.96 | 83.11 | 28.88 | 17.69 | 18.65 | 21.36 | 19.77 | 19.23 | 17.79 | 21.58 | 22.70 | 21.42 |
| <i>Aliphatic</i>       | 68.67 | 69.10 | 58.55 | 57.86 | 60.63 | 30.58 | 36.65 | 56.26 | 27.97 | 50.83 | 29.78 | 18.33 | 28.82 | 18.81 | 19.98 | 24.03 | 21.10 | 22.16 | 25.04 | 23.39 |
| <i>Hydrophobic</i>     | 38.41 | 41.82 | 40.60 | 36.01 | 49.23 | 38.04 | 36.55 | 53.49 | 24.29 | 52.16 | 31.91 | 38.25 | 36.81 | 34.04 | 33.72 | 35.86 | 33.56 | 36.49 | 34.47 | 35.32 |
| <i>Polar uncharged</i> | 17.00 | 19.07 | 27.22 | 23.76 | 20.83 | 42.67 | 38.95 | 41.02 | 37.24 | 44.59 | 39.69 | 33.19 | 38.63 | 41.29 | 38.73 | 36.28 | 39.69 | 36.07 | 40.12 | 39.16 |

| B. Gram +ve            | -10   | -9    | -8    | -7    | -6    | -5    | -4    | -3    | -2    | -1    | +1    | +2    | +3    | +4    | +5    | +6    | +7    | +8    | +9    | +10   |
|------------------------|-------|-------|-------|-------|-------|-------|-------|-------|-------|-------|-------|-------|-------|-------|-------|-------|-------|-------|-------|-------|
|                        | P10   | P9    | P8    | P7    | P6    | P5    | P4    | P3    | P2    | P1    | P1'   | P2'   | P3'   | P4'   | P5'   | P6'   | P7'   | P8'   | P9'   | P10'  |
| Ala(A)                 | 25.60 | 16.67 | 14.88 | 11.90 | 19.05 | 7.14  | 10.12 | 51.79 | 11.31 | 83.93 | 36.31 | 9.52  | 7.14  | 6.55  | 11.90 | 7.74  | 10.71 | 10.71 | 10.12 | 5.95  |
| Cys(C)                 | 0.60  | 1.19  | 0.60  | 0.60  | 0.00  | 0.00  | 0.00  | 0.00  | 0.60  | 0.00  | 0.60  | 0.00  | 0.60  | 1.19  | 0.60  | 0.60  | 0.00  | 0.60  | 0.60  | 0.00  |
| Asp(D)                 | 0.00  | 0.60  | 0.60  | 1.19  | 2.38  | 2.98  | 4.17  | 0.00  | 2.38  | 0.00  | 11.31 | 10.71 | 7.14  | 6.55  | 9.52  | 7.14  | 8.33  | 7.14  | 8.33  | 7.14  |
| Glu(E)                 | 1.79  | 0.00  | 0.60  | 1.79  | 1.19  | 3.57  | 4.76  | 1.79  | 5.36  | 0.00  | 9.52  | 13.69 | 5.36  | 4.17  | 8.33  | 5.95  | 5.95  | 6.55  | 5.95  | 8.33  |
| Phe(F)                 | 7.74  | 9.52  | 4.76  | 7.74  | 1.79  | 1.19  | 0.60  | 1.19  | 11.90 | 0.00  | 2.38  | 1.19  | 3.57  | 2.38  | 3.57  | 4.17  | 1.79  | 0.00  | 1.79  | 2.98  |
| Gly(G)                 | 6.55  | 5.95  | 11.90 | 7.14  | 7.14  | 8.33  | 6.55  | 1.79  | 4.17  | 4.76  | 1.19  | 7.74  | 8.93  | 8.33  | 5.36  | 6.55  | 4.17  | 4.76  | 6.55  | 7.14  |
| His(H)                 | 0.00  | 0.00  | 0.60  | 1.19  | 1.79  | 0.60  | 1.19  | 0.00  | 6.55  | 0.00  | 1.19  | 1.79  | 0.60  | 1.19  | 1.19  | 0.60  | 1.19  | 1.19  | 1.79  | 1.19  |
| Ile(I)                 | 5.36  | 6.55  | 5.36  | 5.36  | 4.76  | 1.79  | 3.57  | 2.98  | 1.19  | 0.00  | 1.79  | 1.19  | 3.57  | 3.57  | 2.38  | 4.17  | 7.14  | 2.98  | 2.98  | 2.98  |
| Lys(K)                 | 0.00  | 0.00  | 0.60  | 0.60  | 2.38  | 4.17  | 5.36  | 0.60  | 8.93  | 2.38  | 5.36  | 1.19  | 13.10 | 6.55  | 5.95  | 5.36  | 7.14  | 7.14  | 8.93  | 7.14  |
| Leu(L)                 | 19.64 | 20.83 | 15.48 | 11.90 | 5.36  | 3.57  | 4.76  | 1.19  | 5.36  | 1.19  | 1.19  | 1.19  | 5.36  | 2.98  | 5.36  | 4.17  | 4.76  | 6.55  | 8.33  | 4.76  |
| Met(M)                 | 1.19  | 2.98  | 5.95  | 3.57  | 1.19  | 0.60  | 3.57  | 0.60  | 1.79  | 0.00  | 0.60  | 0.00  | 0.60  | 0.60  | 0.60  | 0.60  | 1.79  | 1.79  | 1.79  | 1.19  |
| Asn(N)                 | 2.38  | 2.98  | 1.79  | 4.76  | 1.79  | 7.74  | 5.36  | 0.00  | 4.76  | 0.00  | 2.98  | 4.17  | 5.95  | 7.14  | 9.52  | 5.95  | 4.17  | 8.93  | 5.36  | 6.55  |
| Pro(P)                 | 0.00  | 5.95  | 4.76  | 5.95  | 17.26 | 11.90 | 12.50 | 0.00  | 0.60  | 0.60  | 0.00  | 13.10 | 7.14  | 14.29 | 3.57  | 9.52  | 7.74  | 7.14  | 7.14  | 2.38  |
| Gln(Q)                 | 0.60  | 0.60  | 1.19  | 5.36  | 5.36  | 5.95  | 3.57  | 0.60  | 11.90 | 0.00  | 5.36  | 1.79  | 4.17  | 4.17  | 4.17  | 7.74  | 3.57  | 2.98  | 3.57  | 5.95  |
| Arg(R)                 | 1.19  | 0.00  | 0.00  | 0.00  | 0.60  | 1.19  | 1.19  | 1.79  | 2.38  | 1.19  | 1.79  | 0.60  | 2.38  | 1.19  | 1.19  | 1.19  | 2.38  | 1.79  | 1.19  | 4.17  |
| Ser(S)                 | 6.55  | 10.71 | 10.12 | 7.14  | 7.74  | 16.07 | 6.55  | 9.52  | 12.50 | 3.57  | 10.71 | 10.71 | 8.33  | 5.36  | 7.74  | 4.17  | 8.93  | 8.93  | 8.93  | 8.33  |
| Thr(T)                 | 7.74  | 4.76  | 10.71 | 10.71 | 13.10 | 16.07 | 16.67 | 2.38  | 1.79  | 1.19  | 2.38  | 14.29 | 7.74  | 14.29 | 8.93  | 10.12 | 11.31 | 8.93  | 7.74  | 9.52  |
| Val(V)                 | 11.90 | 9.52  | 7.74  | 11.90 | 6.55  | 6.55  | 8.33  | 23.81 | 3.57  | 1.19  | 4.17  | 5.95  | 6.55  | 7.14  | 3.57  | 9.52  | 6.55  | 7.74  | 5.95  | 9.52  |
| Trp(W)                 | 0.60  | 1.19  | 1.19  | 1.19  | 0.60  | 0.60  | 0.60  | 0.00  | 0.60  | 0.00  | 0.60  | 0.00  | 0.00  | 0.60  | 1.19  | 1.79  | 1.19  | 0.00  | 0.60  | 1.79  |
| Tyr(Y)                 | 0.60  | 0.00  | 1.19  | 0.00  | 0.00  | 0.00  | 0.60  | 0.00  | 2.38  | 0.00  | 0.60  | 1.19  | 1.79  | 1.79  | 5.36  | 2.98  | 1.19  | 4.17  | 2.38  | 2.98  |
| <i>Charged</i>         | 2.98  | 0.60  | 2.38  | 4.76  | 8.33  | 12.50 | 16.67 | 4.17  | 25.60 | 3.57  | 29.17 | 27.98 | 28.57 | 19.64 | 26.19 | 20.24 | 25.00 | 23.81 | 26.19 | 27.98 |
| <i>Small</i>           | 38.69 | 33.33 | 36.90 | 26.19 | 33.93 | 31.55 | 23.21 | 63.10 | 27.98 | 92.26 | 48.21 | 27.98 | 24.40 | 20.24 | 25.00 | 18.45 | 23.81 | 24.40 | 25.60 | 21.43 |
| <i>Aliphatic</i>       | 62.50 | 53.57 | 43.45 | 41.07 | 35.71 | 19.05 | 26.79 | 79.76 | 21.43 | 86.31 | 43.45 | 17.86 | 22.62 | 20.24 | 23.21 | 25.60 | 29.17 | 27.98 | 27.38 | 23.21 |
| <i>Hydrophobic</i>     | 52.38 | 52.38 | 45.24 | 48.21 | 53.57 | 33.93 | 44.64 | 80.95 | 39.88 | 88.10 | 51.19 | 32.14 | 41.67 | 41.67 | 32.74 | 42.86 | 44.05 | 37.50 | 39.29 | 33.93 |
| <i>Polar uncharged</i> | 25.00 | 26.19 | 37.50 | 35.71 | 35.12 | 54.17 | 39.29 | 14.29 | 38.10 | 9.52  | 23.81 | 39.88 | 37.50 | 42.26 | 41.67 | 38.10 | 33.33 | 39.29 | 35.12 | 40.48 |

| C. Gram -ve             | -10          | -9           | -8           | -7           | -6           | -5           | -4           | -3           | -2           | -1           | +1           | +2           | +3           | +4           | +5           | +6    | +7           | +8           | +9           | +10          |
|-------------------------|--------------|--------------|--------------|--------------|--------------|--------------|--------------|--------------|--------------|--------------|--------------|--------------|--------------|--------------|--------------|-------|--------------|--------------|--------------|--------------|
|                         | P10          | P9           | P8           | P7           | P6           | P5           | P4           | P3           | P2           | P1           | P1'          | P2'          | P3'          | P4'          | P5'          | P6'   | P7'          | P8'          | P9'          | P10'         |
| Ala(A)                  | <b>22.48</b> | <b>23.45</b> | 16.94        | 16.94        | <b>30.62</b> | 16.94        | 16.61        | <b>61.89</b> | 6.19         | <b>93.16</b> | <b>41.69</b> | 5.86         | 8.14         | 8.14         | <b>11.40</b> | 8.79  | 9.45         | 8.47         | 7.49         | <b>11.40</b> |
| Cys(C)                  | 1.95         | 1.95         | 3.58         | 0.65         | 1.30         | 0.98         | 0.65         | 0.65         | 0.00         | 0.00         | 0.00         | 0.00         | 1.30         | 0.00         | 0.65         | 0.65  | 0.00         | 0.98         | 0.65         | 1.95         |
| Asp(D)                  | 0.33         | 0.33         | 0.33         | 0.00         | 0.00         | 0.00         | 0.33         | 0.00         | 0.00         | 0.00         | 7.17         | <b>17.26</b> | 3.58         | 9.45         | 5.21         | 6.19  | 6.51         | 5.21         | 4.56         | 6.84         |
| Glu(E)                  | 0.65         | 0.00         | 0.65         | 0.00         | 0.65         | 0.65         | 0.33         | 0.00         | 0.65         | 0.00         | 6.19         | <b>16.94</b> | 4.56         | 5.86         | 8.14         | 8.14  | 6.51         | 5.54         | 6.19         | 5.54         |
| Phe(F)                  | 4.56         | 7.49         | 7.17         | <b>14.33</b> | 1.95         | 7.17         | 2.93         | 0.98         | <b>11.40</b> | 0.00         | 0.98         | 0.98         | 3.58         | 1.30         | 1.95         | 1.95  | 4.89         | 3.26         | 1.95         | 2.61         |
| Gly(G)                  | 6.51         | 3.91         | <b>14.98</b> | 6.84         | 4.23         | <b>17.26</b> | 5.21         | 0.98         | 0.98         | 2.93         | 6.19         | 6.51         | 7.49         | 6.51         | 5.54         | 8.14  | 6.51         | <b>12.38</b> | <b>10.42</b> | 6.84         |
| His(H)                  | 0.00         | 0.00         | 0.33         | 0.65         | 0.00         | 1.63         | 0.65         | 0.33         | <b>11.40</b> | 0.33         | 0.98         | 0.33         | 0.98         | 0.98         | 1.63         | 2.61  | 1.95         | 0.98         | 1.30         | 0.65         |
| Ile(I)                  | 4.89         | 4.89         | 2.28         | 7.17         | 2.61         | 0.33         | 1.95         | 1.30         | 1.95         | 0.00         | 0.33         | 2.93         | 4.56         | 5.21         | 6.51         | 4.56  | 6.51         | 6.19         | 6.19         | 5.21         |
| Lys(K)                  | 0.00         | 0.33         | 0.00         | 0.33         | 0.00         | 0.33         | 0.65         | 0.00         | 0.98         | 0.00         | 2.93         | 1.63         | 6.19         | 3.58         | 2.93         | 8.14  | 4.23         | 7.17         | 6.51         | <b>10.75</b> |
| Leu(L)                  | <b>26.71</b> | <b>30.29</b> | <b>28.01</b> | <b>19.54</b> | 2.93         | 9.45         | 3.58         | 5.86         | <b>17.59</b> | 0.33         | 3.26         | 1.63         | 8.14         | 7.82         | 6.84         | 5.21  | 4.89         | 7.17         | 5.54         | 4.89         |
| Met(M)                  | 3.26         | 3.58         | 3.58         | 5.21         | 3.91         | 3.91         | 1.30         | 0.00         | 6.19         | 0.00         | 0.00         | 0.00         | 1.30         | 0.98         | 1.30         | 0.98  | 3.26         | 0.98         | 1.30         | 1.63         |
| Asn(N)                  | 0.65         | 0.65         | 0.00         | 0.98         | 0.98         | 3.26         | 4.56         | 0.33         | 4.56         | 0.33         | 3.58         | 5.86         | 5.21         | 6.19         | 9.45         | 6.19  | 4.23         | 3.91         | 8.47         | 4.89         |
| Pro(P)                  | 0.98         | 0.98         | 0.33         | 1.30         | 6.51         | 5.21         | <b>16.61</b> | 0.00         | 0.33         | 0.00         | 0.00         | <b>10.75</b> | 7.82         | 7.17         | 7.82         | 8.14  | 4.56         | 3.58         | 6.51         | 2.61         |
| Gln(Q)                  | 0.98         | 1.30         | 0.33         | 0.33         | 0.33         | 3.91         | 5.54         | 0.65         | <b>14.33</b> | 1.30         | <b>12.05</b> | 4.89         | 7.49         | 3.58         | 4.56         | 3.26  | 6.19         | 7.82         | 5.21         | 4.23         |
| Arg(R)                  | 0.00         | 0.65         | 0.65         | 0.33         | 0.00         | 0.98         | 0.65         | 0.98         | 0.98         | 0.00         | 0.65         | 0.33         | 0.98         | 2.28         | 0.65         | 2.93  | 3.58         | 1.95         | 0.98         | 1.95         |
| Ser(S)                  | <b>11.73</b> | 7.82         | 7.49         | <b>12.05</b> | <b>33.22</b> | <b>14.33</b> | <b>24.10</b> | 9.12         | 5.54         | 1.30         | 4.23         | 5.54         | 5.21         | 5.86         | 5.86         | 4.23  | 4.56         | 5.21         | 7.82         | 8.79         |
| Thr(T)                  | 4.89         | 4.23         | 5.86         | 4.89         | 5.86         | 8.47         | 6.84         | 4.56         | 3.91         | 0.33         | 3.91         | <b>10.75</b> | <b>11.07</b> | <b>13.03</b> | 6.19         | 9.77  | 6.84         | 7.49         | 7.49         | 6.84         |
| Val(V)                  | 7.82         | 7.49         | 6.84         | 6.19         | 4.23         | 4.56         | 4.56         | <b>12.38</b> | 5.86         | 0.00         | 3.26         | 5.86         | 9.77         | 6.51         | 9.45         | 6.84  | <b>10.10</b> | 6.84         | 6.19         | 8.47         |
| Trp(W)                  | 1.30         | 0.33         | 0.65         | 0.98         | 0.33         | 0.65         | 0.00         | 0.00         | 2.28         | 0.00         | 0.65         | 1.63         | 0.65         | 1.95         | 0.33         | 0.98  | 1.63         | 1.30         | 1.30         | 1.30         |
| Tyr(Y)                  | 0.33         | 0.33         | 0.00         | 1.30         | 0.33         | 0.00         | 2.93         | 0.00         | 4.89         | 0.00         | 1.95         | 0.33         | 1.95         | 3.58         | 3.58         | 2.28  | 3.58         | 3.58         | 3.91         | 2.61         |
| <i>Charged</i>          | <b>0.98</b>  | <b>1.30</b>  | <b>1.95</b>  | <b>1.30</b>  | <b>0.65</b>  | <b>3.58</b>  | <b>2.61</b>  | <b>1.30</b>  | 14.01        | <b>0.33</b>  | 17.92        | 36.48        | 16.29        | 22.15        | 18.57        | 28.01 | 22.80        | 20.85        | 19.54        | 25.73        |
| <i>Small</i>            | 40.72        | 35.18        | 39.41        | 35.83        | <b>68.08</b> | 48.53        | 45.93        | <b>71.99</b> | 12.70        | <b>97.39</b> | <b>52.12</b> | 17.92        | 20.85        | 20.52        | 22.80        | 21.17 | 20.52        | 26.06        | 25.73        | 27.04        |
| <i>Aliphatic</i>        | <b>61.89</b> | <b>66.12</b> | <b>54.07</b> | 49.84        | 40.39        | 31.27        | 26.71        | <b>81.43</b> | 31.60        | <b>93.49</b> | 48.53        | 16.29        | 30.62        | 27.69        | 34.20        | 25.41 | 30.94        | 28.66        | 25.41        | 29.97        |
| <i>Hydrophobic</i>      | 45.28        | 48.53        | 37.79        | <b>52.44</b> | <b>50.16</b> | 39.09        | 44.63        | <b>76.55</b> | 35.18        | <b>93.16</b> | 49.84        | 29.64        | 42.02        | 34.85        | 41.69        | 40.39 | 44.63        | 37.79        | 37.46        | 43.97        |
| <i>Polar un-charged</i> | 27.04        | 20.20        | 32.25        | 27.04        | 46.25        | 48.21        | 49.84        | 16.29        | 34.20        | <b>6.19</b>  | 31.92        | 33.88        | 39.74        | 38.76        | 35.83        | 34.53 | 31.92        | 41.37        | 43.97        | 36.16        |
